# Supplementary material for: Nanotextured Si surfaces derived from block-copolymer self-assembly with superhydrophobic, superhydrophilic, or superamphiphobic properties
Source: Royal Society of Chemistry journal article supplement (doi:10.1039/c8ra00414e), 2018-01-01
Supplement: c8ra00414e1.pdf [file c8ra00414e1.pdf]

## Electronic Supplementary Information

for

### **Nanotextured Si Surfaces Derived from Block–Copolymer Self–Assembly with Superhydrophobic, Superhydrophilic, or Superamphiphobic Properties**

Agnieszka Telecka<sup>1</sup>, Tao Li<sup>1,2</sup>, Sokol Ndoni<sup>1,3</sup>, and Rafael Taboryski<sup>1,\*</sup>

<sup>1</sup>Department of Micro- and Nanotechnology, Technical University of Denmark, DK-2800 Kongens Lyngby, Denmark

<sup>2</sup>Department of Electronic and Electrical Engineering, University College London, WC1E7JE London, Great Britain

<sup>3</sup>Center for Nanostructured Graphene, CNG, Technical University of Denmark, DK-2800 Kongens Lyngby, Denmark

\*[rata@nanotech.dtu.dk](mailto:rata@nanotech.dtu.dk)

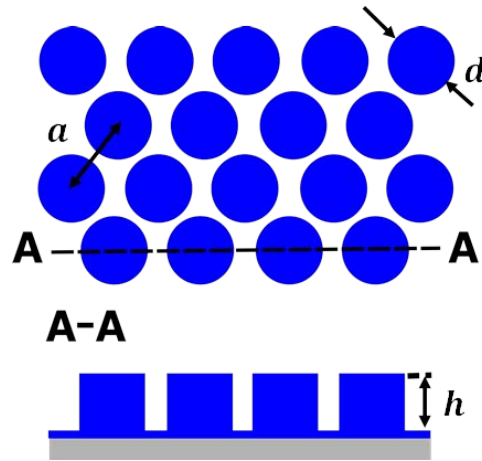

**Figure S1:** Sketch of hexagonal pillar structure dimensions. Top view and cross-section view.

**Table S1** Etching times for the straight side-wall **nanopillar surfaces** with corresponding geometrical parameters derived from pitch size, diameter, and height together with the respective measured wetting properties. Pitch size is  $a = (72 \pm 3)$  nm for all structures. Uncertainties are obtained as SD ( $n=3$ ) (measured WCAs and roll-off angles) and from measurement of  $d$  and  $a$  by SEM inspection to determine SD ( $N=10$ ) for  $d$  and  $a$  and subsequent employment of standard rules for error propagation to determine uncertainties in the other derived geometrical parameters.

| Etching time [s] | Aspect ratio $h/d$ | Diameter to pitch $d/a$ | Solid fraction $f_s$ | Roughness factor $r$ | Apparent CA $\theta$ [°]* | Roll off angle $\alpha$ [°]* |
|------------------|--------------------|-------------------------|----------------------|----------------------|---------------------------|------------------------------|
| 170              | $1.0 \pm 0.2$      | $0.9 \pm 0.1$           | $0.7 \pm 0.2$        | $3.9 \pm 0.5$        | $131 \pm 1$               | Pinned                       |
| 180              | $1.9 \pm 0.3$      | $0.83 \pm 0.08$         | $0.6 \pm 0.1$        | $5.6 \pm 0.6$        | $132.4 \pm 0.4$           | $89 \pm 9$                   |
| 200              | $2.8 \pm 0.4$      | $0.8 \pm 0.1$           | $0.5 \pm 0.1$        | $6.9 \pm 0.8$        | $144.2 \pm 0.7$           | $42 \pm 7$                   |
| 220              | $3.4 \pm 0.4$      | $0.7 \pm 0.1$           | $0.4 \pm 0.1$        | $7.1 \pm 0.8$        | $155 \pm 2$               | $26 \pm 4$                   |
| 250              | $4.8 \pm 0.6$      | $0.7 \pm 0.1$           | $0.4 \pm 0.1$        | $8.5 \pm 0.9$        | $160 \pm 1$               | $14 \pm 1$                   |
| 280              | $6.1 \pm 0.9$      | $0.6 \pm 0.1$           | $0.3 \pm 0.1$        | $8.9 \pm 1.2$        | $165.6 \pm 0.7$           | $2.6 \pm 0.3$                |
| 300              | $10 \pm 1$         | $0.42 \pm 0.06$         | $0.16 \pm 0.04$      | $7.5 \pm 0.9$        | $169.8 \pm 0.5$           | $1.1 \pm 0.5$                |
| 320              | $13 \pm 2$         | $0.39 \pm 0.07$         | $0.14 \pm 0.05$      | $8.0 \pm 1.2$        | $170.5 \pm 1.5$           | $1.2 \pm 0.2$                |

\*Apparent contact angle and roll-off angle are given for the FDTS coated samples.

**Table S2:** Etching times for the **nanohole surfaces** with corresponding geometrical parameters derived from pitch size, diameter, and height together with the respective measured wetting properties. Pitch size is  $a = (72 \pm 3)$  nm for all structures. Uncertainties are obtained as SD ( $n=3$ ), and employment of standard rules for error propagation.

| Etching time [s] | Aspect ratio $h/d$ | Diameter to pitch $d/a$ | Solid fraction $f_s$ | Roughness factor $r$ | Apparent CA $\theta$ [°]* | Roll-off angle $\alpha$ [°]* |
|------------------|--------------------|-------------------------|----------------------|----------------------|---------------------------|------------------------------|
| 250              | 2.26±0.06          | 0.70±0.03               | 0.55±0.05            | 5.9±0.4              | 155±1                     | 30.6±1.4                     |
| 300              | 3.2±0.1            | 0.72±0.04               | 0.53±0.06            | 7.2±0.5              | 160±1                     | 24.0±0.6                     |
| 400              | 4.5±0.2            | 0.74±0.05               | 0.51±0.07            | 9.9±0.8              | 167.6±0.2                 | 7.8±0.4                      |
| 500              | 4.9±0.3            | 0.77±0.08               | 0.47±0.09            | 11.6±1.1             | 170.3±0.5                 | 7±2                          |

\*Apparent contact angle and roll-off angle are given for the FDTS coated samples.

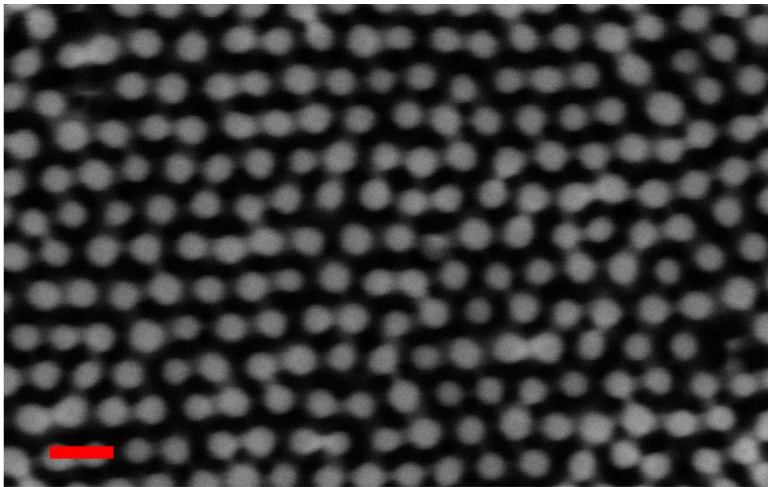

100 nm

**Figure S2:** SEM top view image of the re-entrant nanostructure.

**Table S3:** Dimensions and convex texture angle  $\psi$  of re-entrant nanostructure.

| $d$ [nm] | $b$ [nm] | $c$ [nm] | $\cos \psi$  | $\psi$ [°] |
|----------|----------|----------|--------------|------------|
| 47 ± 3*  | 19 ± 1*  | 26 ± 1*  | 0.54 ± 0.03* | 56 ± 7*    |

\*SD,  $n = 10$  obtained from SEM images.
